# Supplementary material for: Comparison of breath sampling methods: a post hoc analysis from observational cohort studies
Source: Royal Society of Chemistry journal article supplement (doi:10.1039/c8an01823e), 2019-01-01
Supplement: c8an01823e2.xlsx [file c8an01823e2.xlsx]

## Sheet: Notes
For the initial quality control, a compound was removed if any of the below were true:
a) It was only present in one patient
b) It was only ever present at a raw abundance of < 20,000 counts
c) It had a rention time greater than 40 minutes
d) It was an internal standard (see last tab for values)
e) It had a library match for a silicon containing compound
The compounds that had a library match < 50% were given "base ion m/z@retention time" as an indentifier (e.g. 66@1.40)
Missing values were imputated to be an arbitrarly close to zero value, in this case 1, to allow normalization and logarithmic compression
Normalized values were obtained by normalizing to the value of the internal standard 1,4-Dichlorobenzene-D4, and then performing a log base 2 operation

## Sheet: Raw
					Compound Abundance
					Malaria Negative																					Malaria Positive
Compound Annotation	Annotation Library Match (%)	Base Ion (m/z)	Retention Time (min)	Number Passed	Patient 1	Patient 2	Patient 3	Patient 4	Patient 5	Patient 6	Patient 7	Patient 8	Patient 9	Patient 10	Patient 11	Patient 12	Patient 13	Patient 14	Patient 15	Patient 16	Patient 17	Patient 18	Patient 19	Patient 20	Patient 21	Patient 22	Patient 23	Patient 24	Patient 25	Patient 26	Patient 27	Patient 28	Patient 29	Patient 30	Patient 31	Patient 32	Patient 33	Patient 34	Patient 35	Patient 36	Patient 37	Patient 38	Patient 39	Patient 40	Patient 41	Patient 42	Patient 43	Patient 44	Patient 45
44@0.76	n/a	44	0.758	1	1	1	1	1	1	30293	1	1	1	1	1	1	1	1	1	1	1	1	1	1	1	1	1	1	1	1	1	1	1	1	1	1	1	1	1	1	1	1	1	1	1	18313	1	1	1
Carbon dioxide	64.2	44	1.35787	15	1	1	1	1	1	197218	123757	114761	1	124979	1	162922	1	106609	172032	1	1	1	302545	1	1	1	1	1	1	1	1	1	1	1	129022	1	1	153359	145307	1	1	127629	1	116143	145572	1	1	1	157586
Aminomethanesulfonic acid	86.57	64	1.39826	47	859585	777286	529071	1100478	842951	586689	650719	1168475	585350	553949	592730	604347	725156	731275	1449972	1596627	743363	874891	1132464	735894	1079136	605101	959846	562562	548765	557144	558150	638264	553320	571568	506754	620190	543582	565432	557122	700699	557423	523297	561531	567172	584991	575089	538208	1031767	1476522
66@1.40	n/a	66	1.4035	2	1	1	1	1	1	1	1	1	1	1	1	1	1	45392	1	1	1	1	1	1	21219	1	1	1	1	1	1	1	1	1	1	1	1	1	1	1	1	1	1	1	1	1	1	1	1
85@1.46	n/a	85	1.4575	2	1	1	1	1	1	1	1	1	1	1	1	1	142517	1	1	1	1	1	1	1	1	1	1	1	1	1	1	1	1	1	124856	1	1	1	1	1	1	1	1	1	1	1	1	1	1
Methacrylamide	69.51	45	1.48223	30	30357	31008	187212	1	38958	24865	161824	1	1	1	55288	1	1	186110	1	458921	1	25559	1	35928	148719	1	169869	51088	28911	153956	1	1	69868	81410	1	1	36970	27961	120855	1	30043	142157	25266	33430	1	524959	1	1006051	393466
Methyltartronic acid	58.88	45	1.48367	3	1	1	1	1	1	1	1	1	1	1	1	1	1	1	176973	1	1	1	1	1	1	1	1	1	1	1	1	1	197571	1	1	1	1	1	1	1	1	1	1	1	1	1	1	318838	1
Acetone	Verified with true standard	43	1.51751	47	2792321	758020	2112095	1040858	934968	701473	7330805	23939492	4004146	4196423	1850128	673355	666722	2334631	633705	653221	258208	795307	525703	356099	462984	549584	725188	1903519	2926908	1775127	11729393	1185082	861785	773438	621154	1200981	671684	655107	1246677	899942	683333	1607583	617532	6751591	2120938	594127	867415	688231	654233
Isoprene	Verified with true standard	67	1.55423	31	1	65709	76366	83758	72138	1	30017	1	1	90322	175043	67830	1	32664	80648	44275	115229	1	89977	57232	1	33483	91198	58265	1	41691	1	1	1	1	59514	75592	38627	40400	76702	92093	33588	55757	38471	64439	1	50879	81725	1	1
Phosphoramidous difluoride	56.38	79	1.6287	14	1	1	1	1	121624	38453	1	1	1	1	27819	69199	1	1	23198	71774	32590	1	19550	26341	17557	11076	25026	1	1	11355	1	1	10170	82541	1	1	20275	1	1	1	21233	1	68981	1	13637	1	1	1	1
3-Penten-2-one, (E)-	61.56	43	1.63975	3	1	28629	1	1	1	1	1	1	1	1	1	1	1	1	75445	1	16432	1	215114	1	1	1	1	1	1	1	1	1	1	1	1	1	1	1	1	1	1	1	1	1	1	1	1	1	1
Hexane, 3,3,4,4-tetrafluoro-	44.44	57	1.64687	10	1	23547	1	51391	1	1	1	48198	36159	1	1	23153	1	1	1	27883	1	14378	1	1	1	1	1	1	18435	1	23776	13530	1	1	1	31338	1	1	1	1	1	1	1	1	10182	10679	45566	1	57906
Acetohydroxamic acid	69.58	42	1.69626	18	1	1	55763	35192	43708	13368	1	1	1	16767	1	1	1	1	27510	1	1	10760	1	1	1	64119	78947	85041	37855	42518	38414	1	59479	37610	1	1	47114	57549	31299	1	1	1	35144	12173	1	53245	1	1	15791
Methylal	60.96	45	1.72675	4	1	1	1	1	1	1	1	1	1	1	11688	17202	1	1	1	1	1	1	1	1	1	1	11868	1	28669	1	1	1	1	1	1	1	1	1	26693	19900	1	37093	1	27131	1	1	1	1	1
1,3-Butanediol, (S)-	72.46	43	1.77803	28	975516	104884	1	132207	56212	53556	1	44720	1	1	1	49304	249081	1	238798	1	1	120188	1	51494	694932	84592	44036	52471	1	19459	1	113307	51116	39816	54182	1	55189	32123	18464	46743	57091	25051	17078	1	30356	1	49249	1	1
Methoxyacetic acid, butyl ester	60.53	44	1.79112	5	1	1	32792	1	1	1	1	1	53156	1	1	1	1	30923	1	1	1	1	1	1	1	1	1	1	1	1	16004	1	1	1	1	31145	35541	1	1	1	1	1	14566	1	1	1	1	14637	1
Butanal	73.95	41	1.83271	11	1	1	1	1	1	25514	23747	1	1	1	12092	1	1	1	16000	1	1	1	1	30577	1	1	24567	48431	13615	33149	20934	14476	57102	44504	1	16765	1	1	1	1	1	75679	1	1	27880	13977	1	1	1
61@1.93	n/a	61	1.929	1	1	1	1	1	1	1	1	11663	1	1	1	1	1	1	1	1	1	1	1	1	1	1	1	1	1	1	1	1	1	1	1	1	1	1	1	1	1	1	1	1	1	1	1	1	36567
Acetic acid	66.24	43	1.9345	2	1	1	1	10841	1	1	1	1	1	1	1	1	1	1	1	3869764	1	12177	1	1	1	1	1	1	1	1	1	1	1	1	1	14451	1	1	1	1	1	12695	1	1	1	1	1	1	6352540
Methane, oxybis[dichloro-	95.77	83	2.00667	3	1	1	1	1	1	1	1	1	1	1	1	1	1	1	1	1	1	1	1	1	1	1	1	232101	1	1	1	1	1	1	167506	1	1	1	1	1	1	113833	1	1	1	1	1	1	1
N-Acetylisoxazolidine	79.58	73	2.1535	3	1	1	1	17153	28241	10970	1	1	1	1	1	1	1	1	1	1	1	1	16349837	1	1	1	1	1	1	1	1	1	1	1	1	1	1	1	1	1	1	10857	1	1	1	1	1	21581786	1
Benzene	99.4	78	2.28666	47	167273	122801	153909	151038	143103	119029	128176	181547	179740	136733	142006	113310	143197	98786	268368	234874	112054	116128	112532	150288	219074	113396	154336	119176	176372	132548	140992	139688	187966	139220	137233	146205	148891	109314	110922	132751	130914	161902	123102	108448	129593	154642	149763	133857	218380
1-Hexene	69.88	43	2.29711	4	1	1	1	14512	11856	1	1	1	1	1	1	1	1	1	1	25731	1	1	26537	1	1	1	17749	1	1	1	1	21808	1	1	1	1	1	1	1	1	1	15492	1	1	1	16963	1	1	49365
45@2.57	n/a	45	2.5715	2	56981	1	1	1	1	1	1	1	1	1	1	1	1	1	1	1	1	1	1	1	1	1	1	1	1	1	1	1	1	1	1	1	1	1	1	1	1	1	1	1	1	1	1	1	101462
74@2.69	n/a	74	2.691	2	1	1	1	1	1	1	1	1	1	1	1	1	1	1	1	1	1	1	52002	1	1	1	1	1	1	1	1	1	1	1	1	1	1	1	1	1	1	1	1	1	1	1	1	132774	1
Butanoic acid, 2-hydroxy-3,3-dimethyl-	67.33	88	2.82074	8	1	12311	1	22444	14893	1	1	33742	49389	1	1	1	38745	1	18744	1	1	16551	1	1	1	40601	22962	1	10319	12439	11432	27134	1	19023	1	1	1	12404	1	1	10160	13526	1	1	1	53814	1	1	1
Neopentane	70.17	57	2.85567	4	1	1	1	1	1	1	23312	1	1	1	14270	1	1	1	1	1	1	1	1	1	1	1	1	1	1	10245	1	1	1	1	1	21349	1	1	1	27274	1	13220	1	1	1	26167	1	1	17070
2,3-Hexanedione	78.39	43	3.32511	2	1	1	1	37775	1	1	1	1	1	14898	1	22074	1	1	1	1	1	10895	1	1	1	1	12027	1	1	19446	1	15547	1	1	16887	1	1	1	1	1	1	1	11005	1	1	1	1	1	1
1,3,5-Cycloheptatriene	87.09	91	3.83139	36	15948	47064	28282	55791	33994	15916	26825	63432	25283	17126	22695	27483	32029	1	49501	19513	25019	1	1	16108	1	38993	39755	35446	31660	34045	38308	38303	23311	24541	30059	36920	1	31915	22114	33809	35018	46549	21407	1	36247	29628	23456	28202	39710
Diisopropyl ether	80.35	45	4.22656	7	1	21602	15228	22608	1	46998	1	1	1	36366	1	18052	1	1	1	1	1	178305	1	25572	1	1	1	1	1	1	1	1	1	1	1	1	1	1	1	1	1	1	1	1	1	1	1	515210	1
2-Butanone, 3-ethoxy-3-methyl-	77.65	87	4.232	1	1	1	1	1	1	1	1	1	21478	1	1	1	1	1	1	1	1	1	1	1	1	1	1	11794	1	1	1	1	1	13190	1	17041	1	1	1	1	10022	1	1	1	1	1	15930	1	1
Cyclopentanone	85.5	55	4.3795	1	1	1	1	12858	1	1	1	1	1	1	1	1	1	1	1	1	1	1	1	1	1	1	1	1	1	1	1	1	1	1	1	20062	1	1	1	1	1	1	1	1	1	1	1	1	12426
Argon	57.97	40	6.39886	6	1	1	1	168761	124762	1	1	1	1	23715	1	1	1	1	16023	1	1	26645	1	1	1	25644	1	1	1	1	26054	1	1	1	1	1	1	1	1	1	1	1	1	1	1	1	1	1	1
1-Methoxy-2-propyl acetate	68.06	43	6.53911	2	1	1	1	1	1	1	1	82500	1	1	19239	1	10548	1	1	1	1	1	1	1	1	1	1	1	1	1	1	1	12328	1	11969	1	1	1	1	1	1	13016	1	1	1	12206	1	33182	1
α-Pinene	Verified with true standard	93	8.55983	4	1	1	1	349771	1	1	1	1	1	1	1	1	1	1	1	1	1	1	1	20679	1	1	1	1	1	21832	1	1	1	1	1	12166	1	17684	1	1	1	1	1	1	1	1	28074	1	1
Benzaldehyde	89.41	77	9.50914	37	23676	22008	21581	31560	23822	21629	18748	1	21764	22914	20713	20650	1	34706	35186	28946	30543	33478	25845	23455	22155	1	23559	20109	22551	20665	22333	1	22234	20625	21911	22611	22845	20535	18813	1	21993	23016	18480	19907	18892	22091	22973	32477	32264
Phenol	91.39	94	10.1131	35	12315	26770	20629	1	40857	26698	24046	38167	1	1	54672	41831	25239	40893	37939	20571	1	20425	1	15189	15003	23956	38397	33178	26592	38323	40557	22436	24692	22661	20446	60250	23912	94193	52069	61454	31524	54014	43586	1	25705	23771	65615	1	22384
3-Carene	Verified with true standard	93	11.0882	4	1	1	1	147702	1	1	1	1	1	1	1	1	1	1	1	1	1	1	1	14711	1	1	1	21248	1	1	1	1	1	1	1	1	1	20360	1	1	1	11683	1	1	1	1	22386	1	1
Phthalic acid, hexyl pent-4-enyl ester	42.85	149	11.7977	2	1	1	1	1	1	1	1	1	1	1	1	1	57085	1	1	1	1	1	1	1	1	15305	1	1	1	1	1	1	1	1	1	1	1	1	1	22421	1	1	1	1	1	1	1	1	1
Cyclohexene, 1-methyl-4-(1-methylethenyl)-, (S)-	89.92	68	11.7978	4	1	1	1	1	1	1	1	1	1	1	1	402654	243657	1	1	1	1	1	1	128349	1	1	1	1	1	1	1	1	1	1	1	1	1	1	1	1	1	1	1	1	1	1	1	1	1
Nonanal	Verified with true standard	41	14.3527	14	1	11503	15349	12332	1	1	1	12193	37287	35771	34447	12128	1	68657	1	13742	36707	12470	1	38881	21875	13934	11094	1	20247	28992	1	60705	18829	1	16357	19481	14417	1	1	17493	18105	15016	1	11038	1	35969	1	51804	1
Cyclobutane-1,1-dicarboxamide, N,N'-di-benzoyloxy-	82.4	105	16.0598	6	19833	1	1	45906	1	17263	1	1	1	1	1	15135	1	1	1	23486	1	1	1	1	23322	1	1	1	1	1	1	1	1	1	1	32309	1	1	1	18729	1	1	1	1	1	1	1	70692	49614
2-Hexen-1-ol, (E)-	77.03	41	17.5487	2	1	1	1	1	1	1	1	1	16587	1	13324	1	1	38327	1	1	11098	1	1	15806	1	1	1	1	1	13244	1	1	1	1	1	1	1	1	1	1	1	1	1	1	1	12924	1	44011	1
72@20.35	n/a	72	20.345	1	1	1	1	20780	1	1	1	13293	1	1	1	1	1	1	1	1	1	1	1	1	1	1	1	1	1	1	1	1	1	1	1	1	1	1	1	1	1	1	1	1	1	1	1	1	1
Phthalamic acid	54.99	73	20.5075	3	1	11849	1	20737	1	1	1	29869	1	1	1	1	1	1	18224	1	1	1	10842	1	12384	1	1	1	1	1	1	12014	1	1	1	1	1	1	1	1	1	1	1	1	10003	1	1	24543	14208
43@23.19	n/a	43	23.1855	1	1	1	1	1	1	1	1	12481	1	1	1	1	1	1	1	1	292045	1	1	1	1	1	1	1	1	1	1	1	1	1	1	1	1	1	1	1	1	1	1	1	1	1	1	1	1
43@25.84	n/a	43	25.8445	2	1	1	1	1	1	1	1	68200	1	1	1	1	1	1	1	1	152166	1	1	1	1	1	1	1	1	1	1	1	1	1	1	1	1	1	1	1	1	1	1	1	1	1	1	1	1
Diethyl Phthalate	68	149	27.9644	5	1	1	1	1	1	1	1	52872	1	1	1	1	1	23894	1	1	1	1	1	72994	31565	1	1	1	1	1	1	1	1	1	1	1	1	1	1	1	1	1	1	1	1	1	1	1	1
57@28.33	n/a	57	28.3275	2	1	1	1	1	1	1	1	70965	1	1	1	1	1	1	1	1	60779	1	1	1	1	1	1	1	1	1	1	1	1	1	1	1	1	1	1	1	1	1	1	1	1	1	1	1	1
43@30.72	n/a	43	30.7155	1	1	1	1	1	1	1	1	46484	1	1	1	1	1	1	1	1	19857	1	1	1	1	1	1	1	1	1	1	1	1	1	1	1	1	1	1	1	1	1	1	1	1	1	1	1	1
Propanedioic acid, propyl-	67.32	44	36.2098	7	21542	1	1	61572	55303	12540	1	1	1	1	1	1	1	1	1	1	1	1	1	42319	1	1	1	1	1	1	1	29952	1	1	1	1	1	10529	19403	1	1	1	16472	1	1	13596	1	45591	1
Butanoic acid	76.23	41	36.2123	3	1	1	1	1	1	1	1	1	1	1	1	1	1	28078	1	1	1	1	54197	1	1	1	1	1	1	1	1	1	1	1	1	1	1	1	1	1	1	1	1	1	21455	1	1	1	1
Octane, 2,7-dimethyl-	88.86	43	36.9604	15	1	1	20006	19332	27847	16137	41640	1	93042	1	1	11050	48600	1	1	1	1	1	1	12922	1	1	51103	1	80739	34042	30781	1	22142	1	24055	1	18946	44235	24211	1	23472	1	19444	14583	20252	1	1	1	1
Hexadecane	94.36	43	38.4384	44	96668	34784	146109	390428	347048	194449	217872	244908	295785	112273	230185	181671	351613	163079	18386	161105	31545	11621	187288	58174	29108	45434	260717	116917	420841	102225	315543	256047	176625	144190	236879	150986	220505	570605	274240	366619	201219	233218	222319	156793	294552	129408	124141	128500	37560
Butanoic acid	70.74	43	39.1775	2	1	1	1	1	1	1	1	1	1	1	1	1	1	12295	18131	1	1	1	35455	20522	1	1	1	1	1	1	1	10938	1	1	1	1	1	1	1	1	1	1	1	1	12743	1	1	17176	1
Hexadecane	95.52	43	39.704	46	93193	68310	106505	271927	220559	195982	193833	301455	233232	84168	173022	190314	330209	51527	33772	36931	37900	24147	365775	100971	62117	78420	235716	101715	299995	155331	367686	153135	226541	86438	349250	160728	264490	453658	385819	351502	237939	234910	237956	151484	457400	134885	108298	1	66139
3,4-Hexanedione, 2,2,5-trimethyl-	75.42	57	39.971	2	1	1	1	1	1	1	63634	1	68683	16394	1	1	1	1	1	1	1	1	1	1	1	1	1	10171	1	10520	1	1	1	1	1	1	1	1	1	1	1	1	1	1	1	1	1	1	1
[truncated: 2 more columns]

## Sheet: Normalized
					Compound Abundance
					Malaria Negative																					Malaria Positive
Compound Annotation	Annotation Library Match (%)	Base Ion (m/z)	Retention Time (min)	Number Passed	Patient 1	Patient 2	Patient 3	Patient 4	Patient 5	Patient 6	Patient 7	Patient 8	Patient 9	Patient 10	Patient 11	Patient 12	Patient 13	Patient 14	Patient 15	Patient 16	Patient 17	Patient 18	Patient 19	Patient 20	Patient 21	Patient 22	Patient 23	Patient 24	Patient 25	Patient 26	Patient 27	Patient 28	Patient 29	Patient 30	Patient 31	Patient 32	Patient 33	Patient 34	Patient 35	Patient 36	Patient 37	Patient 38	Patient 39	Patient 40	Patient 41	Patient 42	Patient 43	Patient 44	Patient 45
44@0.76	n/a	44	0.758	1	-20.4576	-20.2176	-20.4235	-20.0105	-19.9378	-4.99976	-20.3853	-20.2757	-20.3642	-20.4137	-20.3711	-19.839	-20.334	-20.2422	-19.9664	-19.9447	-20.3047	-20.3619	-19.7378	-20.1644	-20.1259	-20.312	-20.2103	-20.3611	-20.4307	-20.3988	-20.338	-20.2924	-20.3869	-19.9084	-20.3804	-20.3648	-20.3676	-19.9414	-19.9612	-20.3767	-20.418	-20.3787	-19.9086	-20.3223	-20.0057	-6.26845	-20.4448	-20.2065	-19.8329
Carbon dioxide	64.2	44	1.35787	15	-20.4576	-20.2176	-20.4235	-20.0105	-19.9378	-2.29703	-3.46818	-3.46742	-20.3642	-3.48235	-20.3711	-2.52513	-20.334	-3.54021	-2.57413	-19.9447	-20.3047	-20.3619	-1.531	-20.1644	-20.1259	-20.312	-20.2103	-20.3611	-20.4307	-20.3988	-20.338	-20.2924	-20.3869	-19.9084	-3.40315	-20.3648	-20.3676	-2.71482	-2.81246	-20.3767	-20.418	-3.41712	-19.9086	-3.49673	-2.85435	-20.429	-20.4448	-20.2065	-2.56708
Aminomethanesulfonic acid	86.57	64	1.39826	47	-0.74428	-0.649561	-1.41039	0.0592365	-0.252699	-0.724224	-1.07366	-0.119499	-1.20527	-1.33428	-1.19406	-0.633936	-0.8661	-0.762131	0.501148	0.661865	-0.801039	-0.623194	0.37324	-0.675257	-0.0844269	-1.10521	-0.337833	-1.25947	-1.36491	-1.31107	-1.24767	-1.00863	-1.30915	-0.783798	-1.42948	-1.12244	-1.31543	-0.832384	-0.873575	-0.958231	-1.3296	-1.38145	-0.809572	-1.20885	-0.847662	-1.2956	-1.40696	-0.229839	0.660913
66@1.40	n/a	66	1.4035	2	-20.4576	-20.2176	-20.4235	-20.0105	-19.9378	-19.8865	-20.3853	-20.2757	-20.3642	-20.4137	-20.3711	-19.839	-20.334	-4.77203	-19.9664	-19.9447	-20.3047	-20.3619	-19.7378	-20.1644	-5.7528	-20.312	-20.2103	-20.3611	-20.4307	-20.3988	-20.338	-20.2924	-20.3869	-19.9084	-20.3804	-20.3648	-20.3676	-19.9414	-19.9612	-20.3767	-20.418	-20.3787	-19.9086	-20.3223	-20.0057	-20.429	-20.4448	-20.2065	-19.8329
85@1.46	n/a	85	1.4575	2	-20.4576	-20.2176	-20.4235	-20.0105	-19.9378	-19.8865	-20.3853	-20.2757	-20.3642	-20.4137	-20.3711	-19.839	-3.21326	-20.2422	-19.9664	-19.9447	-20.3047	-20.3619	-19.7378	-20.1644	-20.1259	-20.312	-20.2103	-20.3611	-20.4307	-20.3988	-20.338	-20.2924	-20.3869	-19.9084	-3.4505	-20.3648	-20.3676	-19.9414	-19.9612	-20.3767	-20.418	-20.3787	-19.9086	-20.3223	-20.0057	-20.429	-20.4448	-20.2065	-19.8329
Methacrylamide	69.51	45	1.48223	30	-5.56782	-5.29729	-2.90918	-20.0105	-4.68816	-5.28463	-3.08127	-20.2757	-20.3642	-20.4137	-4.6164	-19.839	-20.334	-2.73639	-19.9664	-1.13684	-20.3047	-5.72039	-19.7378	-5.03158	-2.94364	-20.312	-2.83621	-4.72043	-5.61141	-3.1666	-20.338	-20.2924	-4.29457	-3.59544	-20.3804	-20.3648	-5.1935	-5.17025	-3.07829	-20.3767	-5.54327	-3.26159	-5.28367	-5.29342	-20.0057	-1.42718	-20.4448	-0.266253	-1.24698
Methyltartronic acid	58.88	45	1.48367	3	-20.4576	-20.2176	-20.4235	-20.0105	-19.9378	-19.8865	-20.3853	-20.2757	-20.3642	-20.4137	-20.3711	-19.839	-20.334	-20.2422	-2.53328	-19.9447	-20.3047	-20.3619	-19.7378	-20.1644	-20.1259	-20.312	-20.2103	-20.3611	-20.4307	-20.3988	-20.338	-20.2924	-2.7949	-19.9084	-20.3804	-20.3648	-20.3676	-19.9414	-19.9612	-20.3767	-20.418	-20.3787	-19.9086	-20.3223	-20.0057	-20.429	-20.4448	-1.92406	-19.8329
Acetone	Verified with true standard	43	1.51751	47	0.955473	-0.685768	0.586748	-0.0211201	-0.103231	-0.466434	2.42021	4.23719	1.56886	1.58706	0.448114	-0.477945	-0.987307	0.912579	-0.692995	-0.62752	-2.32657	-0.760784	-0.733904	-1.72248	-1.30527	-1.24404	-0.742281	0.499115	1.05021	0.360733	3.14566	-0.115868	-0.669941	-0.347437	-1.13581	-0.169012	-1.01014	-0.620007	0.288448	-0.597195	-1.03578	0.237743	-0.672424	2.36452	1.01055	-1.24862	-0.718399	-0.813992	-0.513414
Isoprene	Verified with true standard	67	1.55423	31	-20.4576	-4.21384	-4.20285	-3.65652	-3.79932	-19.8865	-5.51184	-20.2757	-20.3642	-3.95088	-2.95373	-3.78932	-20.334	-5.24677	-3.6671	-4.51053	-3.4906	-20.3619	-3.28052	-4.35986	-20.1259	-5.28088	-3.73356	-4.53078	-20.4307	-5.05131	-20.338	-20.2924	-20.3869	-19.9084	-4.51946	-4.15885	-5.13024	-4.63931	-3.73423	-3.88586	-5.38235	-4.61185	-4.6771	-4.34663	-20.0057	-4.79425	-4.12627	-20.2065	-19.8329
Phosphoramidous difluoride	56.38	79	1.6287	14	-20.4576	-20.2176	-20.4235	-20.0105	-3.04572	-4.65565	-20.3853	-20.2757	-20.3642	-20.4137	-5.60729	-3.76049	-20.334	-20.2422	-5.46473	-3.81356	-5.3126	-20.3619	-5.48291	-5.47937	-6.02611	-6.87687	-5.59914	-20.3611	-20.4307	-6.92772	-20.338	-20.2924	-7.07488	-3.57554	-20.3804	-20.3648	-6.06015	-19.9414	-19.9612	-20.3767	-6.04399	-20.3787	-3.83467	-20.3223	-6.27048	-20.429	-20.4448	-20.2065	-19.8329
3-Penten-2-one, (E)-	61.56	43	1.63975	3	-20.4576	-5.41246	-20.4235	-20.0105	-19.9378	-19.8865	-20.3853	-20.2757	-20.3642	-20.4137	-20.3711	-19.839	-20.334	-20.2422	-3.76331	-19.9447	-6.30053	-20.3619	-2.02305	-20.1644	-20.1259	-20.312	-20.2103	-20.3611	-20.4307	-20.3988	-20.338	-20.2924	-20.3869	-19.9084	-20.3804	-20.3648	-20.3676	-19.9414	-19.9612	-20.3767	-20.418	-20.3787	-19.9086	-20.3223	-20.0057	-20.429	-20.4448	-20.2065	-19.8329
Hexane, 3,3,4,4-tetrafluoro-	44.44	57	1.64687	10	-20.4576	-5.69439	-20.4235	-4.36123	-19.9378	-19.8865	-20.3853	-4.71901	-5.22214	-20.4137	-20.3711	-5.34004	-20.334	-20.2422	-19.9664	-5.17763	-20.3047	-6.55036	-19.7378	-20.1644	-20.1259	-20.312	-20.2103	-20.3611	-6.26058	-20.3988	-5.80075	-6.56855	-20.3869	-19.9084	-20.3804	-5.42917	-20.3676	-19.9414	-19.9612	-20.3767	-20.418	-20.3787	-19.9086	-20.3223	-6.69198	-7.04654	-4.96909	-20.2065	-4.01143
Acetohydroxamic acid	69.58	42	1.69626	18	-20.4576	-20.2176	-4.65647	-4.9075	-4.52218	-6.17997	-20.3853	-20.2757	-20.3642	-6.38033	-20.3711	-19.839	-20.334	-20.2422	-5.21878	-19.9447	-20.3047	-6.96855	-19.7378	-20.1644	-20.1259	-4.34356	-3.94168	-3.98525	-5.22254	-5.02297	-5.10862	-20.2924	-4.52682	-4.70953	-20.3804	-20.3648	-4.84369	-4.12887	-5.02738	-20.3767	-20.418	-20.3787	-4.80759	-6.75088	-20.0057	-4.72867	-20.4448	-20.2065	-5.88604
Methylal	60.96	45	1.72675	4	-20.4576	-20.2176	-20.4235	-20.0105	-19.9378	-19.8865	-20.3853	-20.2757	-20.3642	-20.4137	-6.85834	-5.76866	-20.334	-20.2422	-19.9664	-19.9447	-20.3047	-20.3619	-19.7378	-20.1644	-20.1259	-20.312	-6.67549	-20.3611	-5.62354	-20.3988	-20.338	-20.2924	-20.3869	-19.9084	-20.3804	-20.3648	-20.3676	-19.9414	-5.25703	-6.09619	-20.418	-5.19986	-19.9086	-5.59462	-20.0057	-20.429	-20.4448	-20.2065	-19.8329
1,3-Butanediol, (S)-	72.46	43	1.77803	28	-0.561754	-3.53921	-20.4235	-2.99802	-4.1592	-4.1777	-20.3853	-4.82706	-20.3642	-20.4137	-20.3711	-4.24954	-2.40778	-20.2422	-2.10101	-19.9447	-20.3047	-3.487	-19.7378	-4.51228	-0.719358	-3.94379	-4.78388	-4.68189	-20.4307	-6.15061	-20.338	-3.50255	-4.74542	-4.6273	-4.65488	-20.3648	-4.61547	-4.97006	-5.78878	-4.8642	-4.61703	-5.76614	-5.84873	-20.3223	-5.11602	-20.429	-4.85696	-20.2065	-19.8329
Methoxyacetic acid, butyl ester	60.53	44	1.79112	5	-20.4576	-20.2176	-5.42244	-20.0105	-19.9378	-19.8865	-20.3853	-20.2757	-4.66626	-20.4137	-20.3711	-19.839	-20.334	-5.32579	-19.9664	-19.9447	-20.3047	-20.3619	-19.7378	-20.1644	-20.1259	-20.312	-20.2103	-20.3611	-20.4307	-20.3988	-6.37182	-20.2924	-20.3869	-19.9084	-20.3804	-5.43808	-5.25037	-19.9414	-19.9612	-20.3767	-20.418	-20.3787	-6.07826	-20.3223	-20.0057	-20.429	-20.4448	-6.36919	-19.8329
Butanal	73.95	41	1.83271	11	-20.4576	-20.2176	-20.4235	-20.0105	-19.9378	-5.24746	-5.84988	-20.2757	-20.3642	-20.4137	-6.80931	-19.839	-20.334	-20.2422	-6.00066	-19.9447	-20.3047	-20.3619	-19.7378	-5.26424	-20.1259	-20.312	-5.62584	-4.79748	-6.69783	-5.38208	-5.9844	-6.47105	-4.58566	-4.46671	-20.3804	-6.33163	-20.3676	-19.9414	-19.9612	-20.3767	-20.418	-4.17111	-19.9086	-20.3223	-5.23877	-6.65826	-20.4448	-20.2065	-19.8329
61@1.93	n/a	61	1.929	1	-20.4576	-20.2176	-20.4235	-20.0105	-19.9378	-19.8865	-20.3853	-6.76604	-20.3642	-20.4137	-20.3711	-19.839	-20.334	-20.2422	-19.9664	-19.9447	-20.3047	-20.3619	-19.7378	-20.1644	-20.1259	-20.312	-20.2103	-20.3611	-20.4307	-20.3988	-20.338	-20.2924	-20.3869	-19.9084	-20.3804	-20.3648	-20.3676	-19.9414	-19.9612	-20.3767	-20.418	-20.3787	-19.9086	-20.3223	-20.0057	-20.429	-20.4448	-20.2065	-4.6746
Acetic acid	66.24	43	1.9345	2	-20.4576	-20.2176	-20.4235	-6.60625	-19.9378	-19.8865	-20.3853	-20.2757	-20.3642	-20.4137	-20.3711	-19.839	-20.334	-20.2422	-19.9664	1.93908	-20.3047	-6.79007	-19.7378	-20.1644	-20.1259	-20.312	-20.2103	-20.3611	-20.4307	-20.3988	-20.338	-20.2924	-20.3869	-19.9084	-20.3804	-6.54591	-20.3676	-19.9414	-19.9612	-20.3767	-20.418	-6.74674	-19.9086	-20.3223	-20.0057	-20.429	-20.4448	-20.2065	2.76604
Methane, oxybis[dichloro-	95.77	83	2.00667	3	-20.4576	-20.2176	-20.4235	-20.0105	-19.9378	-19.8865	-20.3853	-20.2757	-20.3642	-20.4137	-20.3711	-19.839	-20.334	-20.2422	-19.9664	-19.9447	-20.3047	-20.3619	-19.7378	-20.1644	-20.1259	-20.312	-20.2103	-2.53673	-20.4307	-20.3988	-20.338	-20.2924	-20.3869	-19.9084	-3.02655	-20.3648	-20.3676	-19.9414	-19.9612	-20.3767	-20.418	-3.58216	-19.9086	-20.3223	-20.0057	-20.429	-20.4448	-20.2065	-19.8329
N-Acetylisoxazolidine	79.58	73	2.1535	3	-20.4576	-20.2176	-20.4235	-5.94429	-5.15228	-6.46518	-20.3853	-20.2757	-20.3642	-20.4137	-20.3711	-19.839	-20.334	-20.2422	-19.9664	-19.9447	-20.3047	-20.3619	4.22498	-20.1644	-20.1259	-20.312	-20.2103	-20.3611	-20.4307	-20.3988	-20.338	-20.2924	-20.3869	-19.9084	-20.3804	-20.3648	-20.3676	-19.9414	-19.9612	-20.3767	-20.418	-6.97238	-19.9086	-20.3223	-20.0057	-20.429	-20.4448	4.15678	-19.8329
Benzene	99.4	78	2.28666	47	-3.10571	-3.31168	-3.19178	-2.80591	-2.81109	-3.02551	-3.41757	-2.80571	-2.90865	-3.35267	-3.25549	-3.04904	-3.20639	-3.65016	-1.93259	-2.1032	-3.53091	-3.53658	-2.95782	-2.96703	-2.38481	-3.52101	-2.97456	-3.49839	-3.00248	-3.3826	-3.23271	-3.20057	-2.8668	-2.82136	-3.31414	-3.20716	-3.18367	-3.20326	-3.20202	-3.35831	-3.41975	-3.07396	-2.99908	-3.59563	-3.02209	-3.19046	-3.25244	-3.17619	-2.09638
1-Hexene	69.88	43	2.29711	4	-20.4576	-20.2176	-20.4235	-6.1855	-6.40446	-19.8865	-20.3853	-20.2757	-20.3642	-20.4137	-20.3711	-19.839	-20.334	-20.2422	-19.9664	-5.29351	-20.3047	-20.3619	-5.04207	-20.1644	-20.1259	-20.312	-6.09483	-20.3611	-20.4307	-20.3988	-20.338	-5.87985	-20.3869	-19.9084	-20.3804	-20.3648	-20.3676	-19.9414	-19.9612	-20.3767	-20.418	-6.45948	-19.9086	-20.3223	-20.0057	-6.37893	-20.4448	-20.2065	-4.24166
45@2.57	n/a	45	2.5715	2	-4.65937	-20.2176	-20.4235	-20.0105	-19.9378	-19.8865	-20.3853	-20.2757	-20.3642	-20.4137	-20.3711	-19.839	-20.334	-20.2422	-19.9664	-19.9447	-20.3047	-20.3619	-19.7378	-20.1644	-20.1259	-20.312	-20.2103	-20.3611	-20.4307	-20.3988	-20.338	-20.2924	-20.3869	-19.9084	-20.3804	-20.3648	-20.3676	-19.9414	-19.9612	-20.3767	-20.418	-20.3787	-19.9086	-20.3223	-20.0057	-20.429	-20.4448	-20.2065	-3.20228
74@2.69	n/a	74	2.691	2	-20.4576	-20.2176	-20.4235	-20.0105	-19.9378	-19.8865	-20.3853	-20.2757	-20.3642	-20.4137	-20.3711	-19.839	-20.334	-20.2422	-19.9664	-19.9447	-20.3047	-20.3619	-4.07151	-20.1644	-20.1259	-20.312	-20.2103	-20.3611	-20.4307	-20.3988	-20.338	-20.2924	-20.3869	-19.9084	-20.3804	-20.3648	-20.3676	-19.9414	-19.9612	-20.3767	-20.418	-20.3787	-19.9086	-20.3223	-20.0057	-20.429	-20.4448	-3.18791	-19.8329
Butanoic acid, 2-hydroxy-3,3-dimethyl-	67.33	88	2.82074	8	-20.4576	-6.62999	-20.4235	-5.55642	-6.07544	-19.8865	-20.3853	-5.23344	-4.7723	-20.4137	-20.3711	-19.839	-5.09231	-20.2422	-5.77231	-19.9447	-20.3047	-6.34731	-19.7378	-20.1644	-20.1259	-5.00279	-5.72332	-20.3611	-7.09772	-6.79617	-6.85717	-5.56461	-20.3869	-5.69291	-20.3804	-20.3648	-20.3676	-6.34286	-19.9612	-20.3767	-7.1074	-6.65527	-19.9086	-20.3223	-20.0057	-4.71334	-20.4448	-20.2065	-19.8329
Neopentane	70.17	57	2.85567	4	-20.4576	-20.2176	-20.4235	-20.0105	-19.9378	-19.8865	-5.87655	-20.2757	-20.3642	-20.4137	-6.57038	-19.839	-20.334	-20.2422	-19.9664	-19.9447	-20.3047	-20.3619	-19.7378	-20.1644	-20.1259	-20.312	-20.2103	-20.3611	-20.4307	-7.07613	-20.338	-20.2924	-20.3869	-19.9084	-20.3804	-5.98291	-20.3676	-19.9414	-19.9612	-5.64143	-20.418	-6.68828	-19.9086	-20.3223	-20.0057	-5.75357	-20.4448	-20.2065	-5.77368
2,3-Hexanedione	78.39	43	3.32511	2	-20.4576	-20.2176	-20.4235	-4.80532	-19.9378	-19.8865	-20.3853	-20.2757	-20.3642	-6.55084	-20.3711	-5.40889	-20.334	-20.2422	-19.9664	-19.9447	-20.3047	-6.95056	-19.7378	-20.1644	-20.1259	-20.312	-6.65629	-20.3611	-20.4307	-6.15157	-20.338	-6.36808	-20.3869	-19.9084	-6.33678	-20.3648	-20.3676	-19.9414	-19.9612	-20.3767	-20.418	-20.3787	-6.48271	-20.3223	-20.0057	-20.429	-20.4448	-20.2065	-19.8329
1,3,5-Cycloheptatriene	87.09	91	3.83139	36	-6.49647	-4.69531	-5.6359	-4.24272	-4.8848	-5.92827	-5.67404	-4.32277	-5.73833	-6.34977	-5.90099	-5.0927	-5.36694	-20.2422	-4.37128	-5.69258	-5.69401	-20.3619	-19.7378	-6.18891	-20.1259	-5.06109	-4.93143	-5.24779	-5.48037	-5.3436	-5.11261	-5.06725	-5.87819	-5.32546	-5.5049	-5.19268	-20.3676	-4.97943	-5.52854	-5.33155	-5.3222	-4.87226	-5.52278	-20.3223	-4.86014	-5.57436	-5.92709	-5.42302	-4.55564
Diisopropyl ether	80.35	45	4.22656	7	-20.4576	-5.81877	-6.52906	-5.54592	-19.9378	-4.36615	-20.3853	-20.2757	-20.3642	-5.26337	-20.3711	-5.69908	-20.334	-20.2422	-19.9664	-19.9447	-20.3047	-2.91795	-19.7378	-5.52212	-20.1259	-20.312	-20.2103	-20.3611	-20.4307	-20.3988	-20.338	-20.2924	-20.3869	-19.9084	-20.3804	-20.3648	-20.3676	-19.9414	-19.9612	-20.3767	-20.418	-20.3787	-19.9086	-20.3223	-20.0057	-20.429	-20.4448	-1.23173	-19.8329
2-Butanone, 3-ethoxy-3-methyl-	77.65	87	4.232	1	-20.4576	-20.2176	-20.4235	-20.0105	-19.9378	-19.8865	-20.3853	-20.2757	-5.97363	-20.4137	-20.3711	-19.839	-20.334	-20.2422	-19.9664	-19.9447	-20.3047	-20.3619	-19.7378	-20.1644	-20.1259	-20.312	-20.2103	-6.83536	-20.4307	-20.3988	-20.338	-20.2924	-20.3869	-6.22121	-20.3804	-6.30807	-20.3676	-19.9414	-19.9612	-20.3767	-7.12713	-20.3787	-19.9086	-20.3223	-20.0057	-20.429	-6.4853	-20.2065	-19.8329
Cyclopentanone	85.5	55	4.3795	1	-20.4576	-20.2176	-20.4235	-6.36008	-19.9378	-19.8865	-20.3853	-20.2757	-20.3642	-20.4137	-20.3711	-19.839	-20.334	-20.2422	-19.9664	-19.9447	-20.3047	-20.3619	-19.7378	-20.1644	-20.1259	-20.312	-20.2103	-20.3611	-20.4307	-20.3988	-20.338	-20.2924	-20.3869	-19.9084	-20.3804	-6.07262	-20.3676	-19.9414	-19.9612	-20.3767	-20.418	-20.3787	-19.9086	-20.3223	-20.0057	-20.429	-20.4448	-20.2065	-6.23179
Argon	57.97	40	6.39886	6	-20.4576	-20.2176	-20.4235	-2.64584	-3.00897	-19.8865	-20.3853	-20.2757	-20.3642	-5.88016	-20.3711	-19.839	-20.334	-20.2422	-5.99859	-19.9447	-20.3047	-5.66036	-19.7378	-20.1644	-20.1259	-5.66569	-20.2103	-20.3611	-20.4307	-20.3988	-5.66875	-20.2924	-20.3869	-19.9084	-20.3804	-20.3648	-20.3676	-19.9414	-19.9612	-20.3767	-20.418	-20.3787	-19.9086	-20.3223	-20.0057	-20.429	-20.4448	-20.2065	-19.8329
1-Methoxy-2-propyl acetate	68.06	43	6.53911	2	-20.4576	-20.2176	-20.4235	-20.0105	-19.9378	-19.8865	-20.3853	-3.94359	-20.3642	-20.4137	-6.13933	-19.839	-6.96935	-20.2422	-19.9664	-19.9447	-20.3047	-20.3619	-19.7378	-20.1644	-20.1259	-20.312	-20.2103	-20.3611	-20.4307	-20.3988	-20.338	-20.2924	-6.79726	-19.9084	-6.83339	-20.3648	-20.3676	-19.9414	-19.9612	-20.3767	-20.418	-6.71072	-19.9086	-20.3223	-20.0057	-6.85373	-20.4448	-5.18841	-19.8329
α-Pinene	Verified with true standard	93	8.55983	4	-20.4576	-20.2176	-20.4235	-1.59441	-19.9378	-19.8865	-20.3853	-20.2757	-20.3642	-20.4137	-20.3711	-19.839	-20.334	-20.2422	-19.9664	-19.9447	-20.3047	-20.3619	-19.7378	-5.82852	-20.1259	-20.312	-20.2103	-20.3611	-20.4307	-5.9846	-20.338	-20.2924	-20.3869	-19.9084	-20.3804	-6.79423	-20.3676	-5.83122	-19.9612	-20.3767	-20.418	-20.3787	-19.9086	-20.3223	-20.0057	-20.429	-5.66782	-20.2065	-19.8329
Benzaldehyde	89.41	77	9.50914	37	-5.92642	-5.7919	-6.02602	-5.06465	-5.39778	-5.48578	-6.19088	-20.2757	-5.95455	-5.92973	-6.03283	-5.5051	-20.334	-5.15929	-4.86373	-5.12365	-5.40619	-5.33101	-5.0802	-5.64679	-5.69053	-20.312	-5.68629	-6.06557	-5.96984	-6.06386	-5.89108	-20.2924	-5.94643	-5.57626	-5.96104	-5.90006	-5.88797	-5.61558	-5.76177	-20.3767	-5.99325	-5.88837	-5.7349	-6.04129	-5.80023	-5.99786	-5.95711	-5.21939	-4.85522
Phenol	91.39	94	10.1131	35	-6.86943	-5.50932	-6.09111	-20.0105	-4.61949	-5.18202	-5.83183	-5.05566	-20.3642	-20.4137	-4.63256	-4.48667	-5.71066	-4.92262	-4.75505	-5.61641	-20.3047	-6.04389	-19.7378	-6.27366	-6.25291	-5.76392	-4.98157	-5.34318	-5.73204	-5.17284	-5.0303	-5.8389	-5.79515	-5.44044	-6.06087	-4.48612	-5.82212	-3.41805	-4.29307	-4.46945	-5.47385	-4.65767	-4.497	-20.3223	-5.35596	-5.89212	-4.44303	-20.2065	-5.38268
3-Carene	Verified with true standard	93	11.0882	4	-20.4576	-20.2176	-20.4235	-2.83813	-19.9378	-19.8865	-20.3853	-20.2757	-20.3642	-20.4137	-20.3711	-19.839	-20.334	-20.2422	-19.9664	-19.9447	-20.3047	-20.3619	-19.7378	-6.31979	-20.1259	-20.312	-20.2103	-5.98608	-20.4307	-20.3988	-20.338	-20.2924	-20.3869	-19.9084	-20.3804	-20.3648	-20.3676	-5.62793	-19.9612	-20.3767	-20.418	-6.86659	-19.9086	-20.3223	-20.0057	-20.429	-5.99445	-20.2065	-19.8329
Phthalic acid, hexyl pent-4-enyl ester	42.85	149	11.7977	2	-20.4576	-20.2176	-20.4235	-20.0105	-19.9378	-19.8865	-20.3853	-20.2757	-20.3642	-20.4137	-20.3711	-19.839	-4.53321	-20.2422	-19.9664	-19.9447	-20.3047	-20.3619	-19.7378	-20.1644	-20.1259	-6.41031	-20.2103	-20.3611	-20.4307	-20.3988	-20.338	-20.2924	-20.3869	-19.9084	-20.3804	-20.3648	-20.3676	-19.9414	-19.9612	-5.9241	-20.418	-20.3787	-19.9086	-20.3223	-20.0057	-20.429	-20.4448	-20.2065	-19.8329
Cyclohexene, 1-methyl-4-(1-methylethenyl)-, (S)-	89.92	68	11.7978	4	-20.4576	-20.2176	-20.4235	-20.0105	-19.9378	-19.8865	-20.3853	-20.2757	-20.3642	-20.4137	-20.3711	-1.21977	-2.43954	-20.2422	-19.9664	-19.9447	-20.3047	-20.3619	-19.7378	-3.19468	-20.1259	-20.312	-20.2103	-20.3611	-20.4307	-20.3988	-20.338	-20.2924	-20.3869	-19.9084	-20.3804	-20.3648	-20.3676	-19.9414	-19.9612	-20.3767	-20.418	-20.3787	-19.9086	-20.3223	-20.0057	-20.429	-20.4448	-20.2065	-19.8329
Nonanal	Verified with true standard	41	14.3527	14	-20.4576	-6.72792	-6.51764	-6.42034	-19.9378	-19.8865	-20.3853	-6.70193	-5.17782	-5.28717	-5.29899	-6.2729	-20.334	-4.17507	-19.9664	-6.19843	-5.14098	-6.75576	-19.7378	-4.91762	-5.70888	-6.5457	-6.77279	-20.3611	-6.12532	-5.57539	-20.338	-4.4029	-6.18624	-19.9084	-6.38278	-6.11501	-6.55208	-19.9414	-19.9612	-6.28218	-6.27391	-6.5045	-19.9086	-6.89209	-20.0057	-5.29457	-20.4448	-4.54575	-19.8329
Cyclobutane-1,1-dicarboxamide, N,N'-di-benzoyloxy-	82.4	105	16.0598	6	-6.18194	-20.2176	-20.4235	-4.52407	-19.9378	-5.81107	-20.3853	-20.2757	-20.3642	-20.4137	-20.3711	-5.95335	-20.334	-20.2422	-19.9664	-5.42522	-20.3047	-20.3619	-19.7378	-20.1644	-5.61647	-20.312	-20.2103	-20.3611	-20.4307	-20.3988	-20.338	-20.2924	-20.3869	-19.9084	-20.3804	-5.38514	-20.3676	-19.9414	-19.9612	-6.18368	-20.418	-20.3787	-19.9086	-20.3223	-20.0057	-20.429	-20.4448	-4.09727	-4.2344
2-Hexen-1-ol, (E)-	77.03	41	17.5487	2	-20.4576	-20.2176	-20.4235	-20.0105	-19.9378	-19.8865	-20.3853	-20.2757	-6.34644	-20.4137	-6.66934	-19.839	-20.334	-5.01611	-19.9664	-19.9447	-6.86674	-20.3619	-19.7378	-6.21621	-20.1259	-20.312	-20.2103	-20.3611	-20.4307	-6.70571	-20.338	-20.2924	-20.3869	-19.9084	-20.3804	-20.3648	-20.3676	-19.9414	-19.9612	-20.3767	-20.418	-20.3787	-19.9086	-20.3223	-20.0057	-6.77127	-20.4448	-4.78095	-19.8329
72@20.35	n/a	72	20.345	1	-20.4576	-20.2176	-20.4235	-5.66755	-19.9378	-19.8865	-20.3853	-6.57732	-20.3642	-20.4137	-20.3711	-19.839	-20.334	-20.2422	-19.9664	-19.9447	-20.3047	-20.3619	-19.7378	-20.1644	-20.1259	-20.312	-20.2103	-20.3611	-20.4307	-20.3988	-20.338	-20.2924	-20.3869	-19.9084	-20.3804	-20.3648	-20.3676	-19.9414	-19.9612	-20.3767	-20.418	-20.3787	-19.9086	-20.3223	-20.0057	-20.429	-20.4448	-20.2065	-19.8329
Phthalamic acid	54.99	73	20.5075	3	-20.4576	-6.68517	-20.4235	-5.67054	-19.9378	-19.8865	-20.3853	-5.40933	-20.3642	-20.4137	-20.3711	-19.839	-20.334	-20.2422	-5.81289	-19.9447	-20.3047	-20.3619	-6.33345	-20.1644	-6.52968	-20.312	-20.2103	-20.3611	-20.4307	-20.3988	-20.338	-6.73999	-20.3869	-19.9084	-20.3804	-20.3648	-20.3676	-19.9414	-19.9612	-20.3767	-20.418	-20.3787	-19.9086	-20.3223	-6.71757	-20.429	-20.4448	-5.6235	-6.03844
43@23.19	n/a	43	23.1855	1	-20.4576	-20.2176	-20.4235	-20.0105	-19.9378	-19.8865	-20.3853	-6.66825	-20.3642	-20.4137	-20.3711	-19.839	-20.334	-20.2422	-19.9664	-19.9447	-2.14891	-20.3619	-19.7378	-20.1644	-20.1259	-20.312	-20.2103	-20.3611	-20.4307	-20.3988	-20.338	-20.2924	-20.3869	-19.9084	-20.3804	-20.3648	-20.3676	-19.9414	-19.9612	-20.3767	-20.418	-20.3787	-19.9086	-20.3223	-20.0057	-20.429	-20.4448	-20.2065	-19.8329
43@25.84	n/a	43	25.8445	2	-20.4576	-20.2176	-20.4235	-20.0105	-19.9378	-19.8865	-20.3853	-4.21821	-20.3642	-20.4137	-20.3711	-19.839	-20.334	-20.2422	-19.9664	-19.9447	-3.08946	-20.3619	-19.7378	-20.1644	-20.1259	-20.312	-20.2103	-20.3611	-20.4307	-20.3988	-20.338	-20.2924	-20.3869	-19.9084	-20.3804	-20.3648	-20.3676	-19.9414	-19.9612	-20.3767	-20.418	-20.3787	-19.9086	-20.3223	-20.0057	-20.429	-20.4448	-20.2065	-19.8329
Diethyl Phthalate	68	149	27.9644	5	-20.4576	-20.2176	-20.4235	-20.0105	-19.9378	-19.8865	-20.3853	-4.58548	-20.3642	-20.4137	-20.3711	-19.839	-20.334	-5.69782	-19.9664	-19.9447	-20.3047	-20.3619	-19.7378	-4.00891	-5.17983	-20.312	-20.2103	-20.3611	-20.4307	-20.3988	-20.338	-20.2924	-20.3869	-19.9084	-20.3804	-20.3648	-20.3676	-19.9414	-19.9612	-20.3767	-20.418	-20.3787	-19.9086	-20.3223	-20.0057	-20.429	-20.4448	-20.2065	-19.8329
57@28.33	n/a	57	28.3275	2	-20.4576	-20.2176	-20.4235	-20.0105	-19.9378	-19.8865	-20.3853	-4.16088	-20.3642	-20.4137	-20.3711	-19.839	-20.334	-20.2422	-19.9664	-19.9447	-4.41346	-20.3619	-19.7378	-20.1644	-20.1259	-20.312	-20.2103	-20.3611	-20.4307	-20.3988	-20.338	-20.2924	-20.3869	-19.9084	-20.3804	-20.3648	-20.3676	-19.9414	-19.9612	-20.3767	-20.418	-20.3787	-19.9086	-20.3223	-20.0057	-20.429	-20.4448	-20.2065	-19.8329
43@30.72	n/a	43	30.7155	1	-20.4576	-20.2176	-20.4235	-20.0105	-19.9378	-19.8865	-20.3853	-4.77125	-20.3642	-20.4137	-20.3711	-19.839	-20.334	-20.2422	-19.9664	-19.9447	-6.02739	-20.3619	-19.7378	-20.1644	-20.1259	-20.312	-20.2103	-20.3611	-20.4307	-20.3988	-20.338	-20.2924	-20.3869	-19.9084	-20.3804	-20.3648	-20.3676	-19.9414	-19.9612	-20.3767	-20.418	-20.3787	-19.9086	-20.3223	-20.0057	-20.429	-20.4448	-20.2065	-19.8329
Propanedioic acid, propyl-	67.32	44	36.2098	7	-6.0627	-20.2176	-20.4235	-4.10047	-4.18272	-6.27221	-20.3853	-20.2757	-20.3642	-20.4137	-20.3711	-19.839	-20.334	-20.2422	-19.9664	-19.9447	-20.3047	-20.3619	-19.7378	-4.79538	-20.1259	-20.312	-20.2103	-20.3611	-20.4307	-20.3988	-20.338	-5.42206	-20.3869	-19.9084	-20.3804	-20.3648	-20.3676	-6.5793	-5.71722	-20.3767	-20.418	-20.3787	-5.90085	-20.3223	-20.0057	-6.69814	-20.4448	-4.73006	-19.8329
Butanoic acid	76.23	41	36.2123	3	-20.4576	-20.2176	-20.4235	-20.0105	-19.9378	-19.8865	-20.3853	-20.2757	-20.3642	-20.4137	-20.3711	-19.839	-20.334	-5.46503	-19.9664	-19.9447	-20.3047	-20.3619	-4.01187	-20.1644	-20.1259	-20.312	-20.2103	-20.3611	-20.4307	-20.3988	-20.338	-20.2924	-20.3869	-19.9084	-20.3804	-20.3648	-20.3676	-19.9414	-19.9612	-20.3767	-20.418	-20.3787	-19.9086	-20.3223	-5.61669	-20.429	-20.4448	-20.2065	-19.8329
Octane, 2,7-dimethyl-	88.86	43	36.9604	15	-20.4576	-20.2176	-6.13535	-5.77176	-5.17255	-5.90838	-5.03965	-20.2757	-3.85861	-20.4137	-20.3711	-6.40719	-4.76536	-20.2422	-19.9664	-19.9447	-20.3047	-20.3619	-19.7378	-6.50685	-20.1259	-20.312	-4.56916	-20.3611	-4.12976	-5.34373	-5.42821	-20.2924	-5.95241	-19.9084	-5.82636	-20.3648	-6.15796	-4.50848	-5.39783	-20.3767	-5.89936	-20.3787	-5.66154	-6.49028	-5.69994	-20.429	-20.4448	-20.2065	-19.8329
Hexadecane	94.36	43	38.4384	44	-3.89681	-5.13151	-3.26681	-1.43576	-1.53301	-2.31743	-2.65221	-2.37382	-2.19002	-3.63702	-2.55864	-2.36798	-1.9104	-2.92697	-5.80013	-2.64709	-5.35962	-6.85749	-2.22289	-4.33631	-5.29674	-4.84054	-2.21815	-3.526	-1.74783	-3.75737	-2.07049	-2.32637	-2.95658	-2.77075	-2.52661	-3.16074	-2.61711	-0.819244	-1.89613	-1.89274	-2.7996	-2.5474	-2.14631	-3.06378	-1.83755	-3.44746	-3.52314	-3.23512	-4.63595
Butanoic acid	70.74	43	39.1775	2	-20.4576	-20.2176	-20.4235	-20.0105	-19.9378	-19.8865	-20.3853	-20.2757	-20.3642	-20.4137	-20.3711	-19.839	-20.334	-6.6564	-5.82027	-19.9447	-20.3047	-20.3619	-4.62409	-5.83951	-20.1259	-20.312	-20.2103	-20.3611	-20.4307	-20.3988	-20.338	-6.87536	-20.3869	-19.9084	-20.3804	-20.3648	-20.3676	-19.9414	-19.9612	-20.3767	-20.418	-20.3787	-19.9086	-20.3223	-6.3683	-20.429	-20.4448	-6.13842	-19.8329
Hexadecane	95.52	43	39.704	46	-3.94963	-4.15784	-3.72293	-1.9576	-2.18698	-2.3061	-2.82088	-2.07411	-2.5328	-4.05269	-2.97048	-2.30093	-2.00101	-4.58914	-4.92291	-4.77219	-5.09484	-5.80238	-1.2572	-3.54082	-4.20317	-4.05309	-2.36359	-3.72695	-2.23616	-3.15377	-1.84985	-3.06798	-2.5975	-3.50899	-1.9665	-3.07053	-2.35471	-1.15013	-1.40364	-1.95349	-2.55778	-2.53697	-2.04824	-3.11347	-1.20262	-3.38766	-3.72012	-20.2065	-3.81964
3,4-Hexanedione, 2,2,5-trimethyl-	75.42	57	39.971	2	-20.4576	-20.2176	-20.4235	-20.0105	-19.9378	-19.8865	-4.42782	-20.2757	-4.29654	-6.41279	-20.3711	-19.839	-20.334	-20.2422	-19.9664	-19.9447	-20.3047	-20.3619	-19.7378	-20.1644	-20.1259	-20.312	-20.2103	-7.04895	-20.4307	-7.03791	-20.338	-20.2924	-20.3869	-19.9084	-20.3804	-20.3648	-20.3676	-19.9414	-19.9612	-20.3767	-20.418	-20.3787	-19.9086	-20.3223	-20.0057	-20.429	-20.4448	-20.2065	-19.8329
[truncated: 2 more columns]

## Sheet: Internal Standards
Compound	Number Passed	Patient 1	Patient 2	Patient 3	Patient 4	Patient 5	Patient 6	Patient 7	Patient 8	Patient 9	Patient 10	Patient 11	Patient 12	Patient 13	Patient 14	Patient 15	Patient 16	Patient 17	Patient 18	Patient 19	Patient 20	Patient 21	Patient 22	Patient 23	Patient 24	Patient 25	Patient 26	Patient 27	Patient 28	Patient 29	Patient 30	Patient 31	Patient 32	Patient 33	Patient 34	Patient 35	Patient 36	Patient 37	Patient 38	Patient 39	Patient 40	Patient 41	Patient 42	Patient 43	Patient 44	Patient 45	Patient 46	Patient 47
Fluorobenzene	47	1425045	1536347	1418220	1714511	1700651	1325691	1475948	1604624	1470311	1454796	1451763	1354901	1452725	1467883	1773627	1488672	1461692	1463726	1359391	1473086	1487000	1471483	1537434	1486010	1414616	1456881	1491930	1478366	1454265	1299024	1472816	1444848	1430550	1274737	1275828	1430752	1423175	1440435	1279844	1457314	1287041	1414589	1423842	1543116	1546781	1503005	1465606
Toluene-D8	47	1131356	1184710	1130003	1300339	1325451	1096074	1158407	1215068	1172693	1153533	1152697	1111197	1151797	1146849	1374606	1106067	1158615	1150201	1093985	1131189	1129504	1154372	1193961	1161871	1136195	1165421	1164194	1150210	1149720	1078158	1160686	1154921	1138305	1063108	1052851	1134923	1138815	1131346	1077298	1149584	1074093	1144478	1137490	1157329	1122565	1141468	1117001
Bromofluorobenzene	47	1284686	1205323	1278229	1127862	1113371	1099793	1262670	1180777	1258215	1282880	1242868	1071507	1230261	1216506	1216702	1082001	1244395	1253232	1015917	1169515	1184543	1235186	1159307	1274340	1282439	1290428	1262222	1220781	1279568	1067600	1265590	1240497	1264243	1080056	1104936	1271496	1284892	1265950	1081793	1263546	1111284	1275202	1297533	1186084	981493	1201493	1109704
1,2-Dichlorobenzene-D4	47	1439924	1219320	1406321	1056208	1004320	969218	1369611	1269383	1349698	1396777	1356143	937821	1321762	1240236	1024469	1009166	1295203	1347578	874314	1175136	1144172	1301750	1213109	1346817	1413401	1382414	1325371	1284187	1371108	984044	1364939	1350249	1352844	1006822	1020757	1361407	1400985	1363343	984192	1311037	1052740	1411728	1427207	1209958	933868	1190363	1048017
